# Supplementary material for: New EDOT–SQ systems for electrochromic applications
Source: Royal Society of Chemistry journal article supplement (doi:10.1039/d4qi01199f), 2024-01-01
Supplement: d4qi01199f1.pdf [file d4qi01199f1.pdf]

*Supporting Information*

*For*

**New EDOT-SQ systems for electrochromic applications**

Aleksandra Mermela,<sup>a</sup> Monika Wałęsa-Chorab,<sup>a</sup> Monika Ludwiczak<sup>b</sup> and Patrycja Żak<sup>a,\*</sup>

<sup>a</sup> Faculty of Chemistry, Adam Mickiewicz University in Poznan, Uniwersytetu Poznańskiego 8, 61-614 Poznań, Poland. E-mail: [pkw@amu.edu.pl](mailto:pkw@amu.edu.pl)

<sup>b</sup> Centre for Advanced Technologies, Uniwersytetu Poznańskiego 10, 61-614 Poznan, Poland

**CONTENTS:**

|                                                   |             |
|---------------------------------------------------|-------------|
| <b>1. Additional analyses of EDOT derivatives</b> | <b>S-2</b>  |
| <b>2. Analytical data of EDOT derivatives</b>     | <b>S-4</b>  |
| 2.1. Analytical data of EDOTs                     | S-4         |
| 2.2. Analytical data of EDOT_SQ systems           | S-5         |
| <b>3. NMR spectra of EDOT derivatives</b>         | <b>S-6</b>  |
| 3.1. NMR spectra of EDOTs                         | S-6         |
| 3.2. NMR spectra of EDOT-SQ systems               | S-8         |
| <b>4. References</b>                              | <b>S-12</b> |

## 1. Additional emission spectra of EDOT derivatives

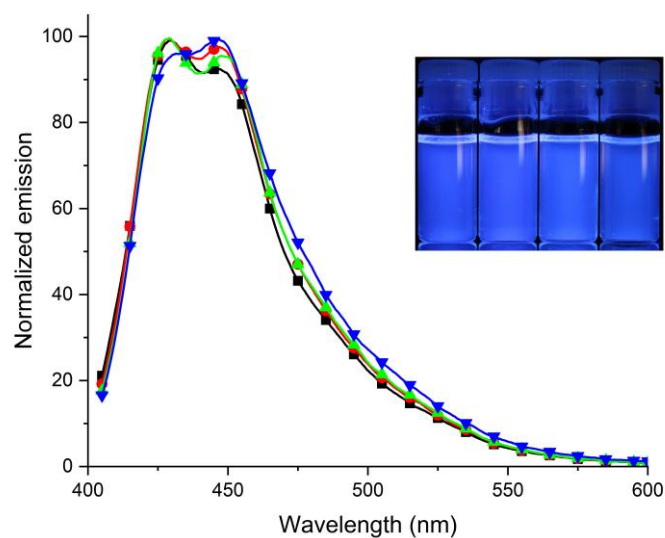

Figure S1. Emission spectra of **EDOT-SQ\_I** in toluene (■), THF (●), CHCl<sub>3</sub> (▲) and acetone (▲) when excited at the absorption maxima.

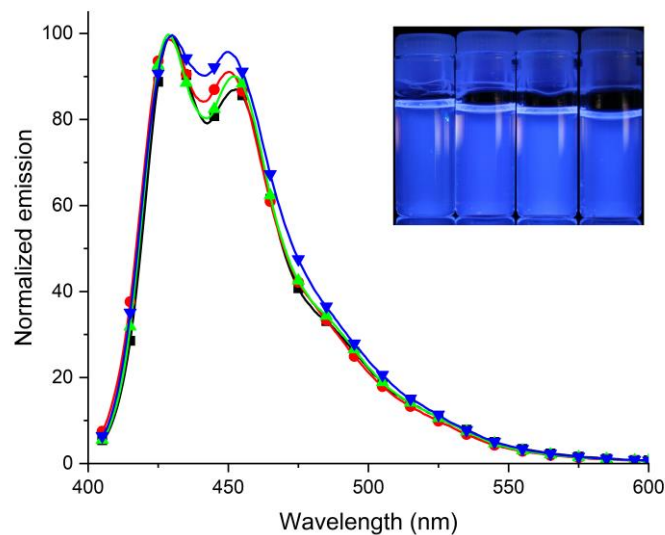

Figure S2. Emission spectra of **EDOT-DDSQ\_I** in toluene (■), THF (●), CHCl<sub>3</sub> (▲) and acetone (▲) when excited at the absorption maxima.

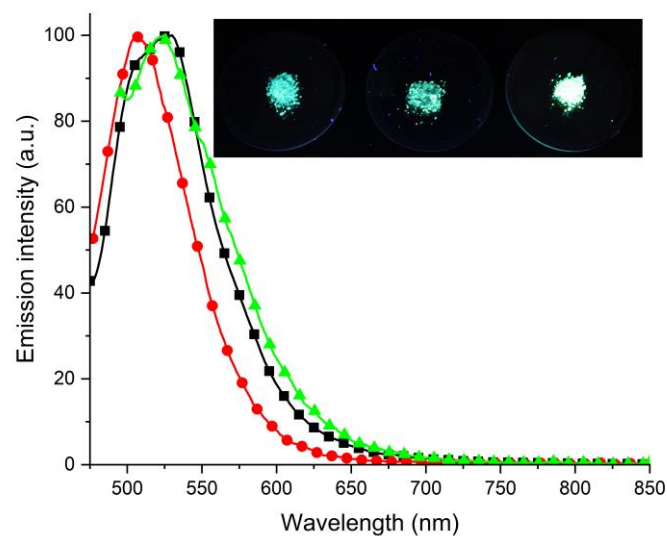

Figure S3. Normalized emission spectra of **EDOT-SQ\_I** (■) **EDOT-SQ\_II** (●) and **EDOT-DDSQ-I** (▲) in the solid state. Insert: the photograph showing the emission in the solid state of **EDOT-SQ\_I**, **EDOT-DDSQ-I** and **EDOT-SQ\_II** (from left to right).

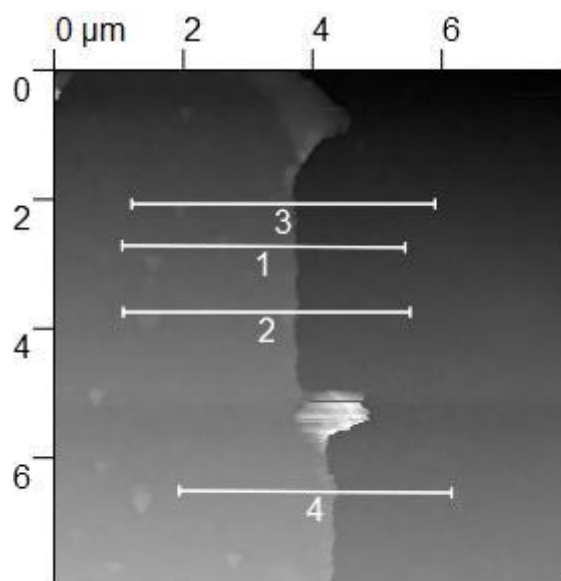

Figure S4. AFM micrograph of **EDOT-DDSQ\_I** polymer deposited on ITO electrode showing the step between the ITO and polymer surface.

## 2. Analytical data of EDOT derivatives

### 2.1. Analytical data of EDOTs

|                                                                                                     |                                                                                                                                                                                                                                                                                                                                                                                                                                                                                                                                                                                                                                                                                                                                                                                                                                                                                                                  |
|-----------------------------------------------------------------------------------------------------|------------------------------------------------------------------------------------------------------------------------------------------------------------------------------------------------------------------------------------------------------------------------------------------------------------------------------------------------------------------------------------------------------------------------------------------------------------------------------------------------------------------------------------------------------------------------------------------------------------------------------------------------------------------------------------------------------------------------------------------------------------------------------------------------------------------------------------------------------------------------------------------------------------------|
| 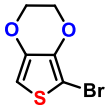 <p>EDOT_Br_I</p>  | <p>Light yellow solid, isolated yield: 70%; <sup>1</sup>H NMR (400 MHz, CDCl<sub>3</sub>, 296K): δ (ppm) 4.18-4.21 (m, 2H, -CH<sub>2</sub>-CH<sub>2</sub>-), 4.25-4.28 (m, 2H, -CH<sub>2</sub>-CH<sub>2</sub>-), 6.34 (s, 1H, S-CH); <sup>13</sup>C NMR (100 MHz, CDCl<sub>3</sub>, 296K): δ (ppm) 64.5 (OCH<sub>2</sub>), 65.0 (OCH<sub>2</sub>), 87.0, 99.6, 140.0, 141.1; MS m/z (rel. intensity): 45.00 (31), 57.10 (21), 69.10 (38), 85.10 (35), 97.10 (15), 141.00 (52), 220.10 (86), 221.00 (11), 222.00 (100, M<sup>+</sup>).</p> <p>These data are accordance with the literature.<sup>[1]</sup></p>                                                                                                                                                                                                                                                                                                    |
|  <p>EDOT_Br_II</p> | <p>Light yellow solid, isolated yield: 81%; <sup>1</sup>H NMR (400 MHz, CDCl<sub>3</sub>, 296K): δ (ppm) 4.27 (s, 4H, -CH<sub>2</sub>-CH<sub>2</sub>-); <sup>13</sup>C NMR (100 MHz, CDCl<sub>3</sub>, 296K): δ (ppm) 65.10 (OCH<sub>2</sub>), 85.67, 139.84; MS m/z (rel. intensity): 84.10 (11), 95.10 (61), 123.10 (21), 125.00 (20), 139.10 (15), 163.10 (13), 165.00 (14), 274.10 (11), 298.20 (41), 299.99 (100, M<sup>+</sup>).</p> <p>These data are accordance with the literature.<sup>[2]</sup></p>                                                                                                                                                                                                                                                                                                                                                                                                   |
|  <p>EDOT_I</p>   | <p>Yellow oil, isolated yield: 94%; <sup>1</sup>H NMR (400 MHz, CDCl<sub>3</sub>, 296K): δ (ppm) 4.15-4.19 (m, 2H, -CH<sub>2</sub>-CH<sub>2</sub>-), 4.20-4.28 (m, 2H, -CH<sub>2</sub>-CH<sub>2</sub>-), 5.16 (d, 1H, J<sub>HH</sub> = 10.9 Hz, -CH=CH<sub>2</sub>), 5.67 (d, 1H, J<sub>HH</sub> = 17.6 Hz, -CH=CH<sub>2</sub>), 6.22 (s, 1H, S-CH), 6.63 (dd, 1H, J<sub>HH</sub> = 17.6, 10.9 Hz, -CH=CH<sub>2</sub>), 7.32 (d, 2H, J<sub>HH</sub> = 8.4 Hz, -C<sub>6</sub>H<sub>4</sub>-), 7.60 (d, 2H, J<sub>HH</sub> = 8.4 Hz, -C<sub>6</sub>H<sub>4</sub>-); <sup>13</sup>C NMR (100 MHz, CDCl<sub>3</sub>, 296K): δ (ppm) 64.43 (OCH<sub>2</sub>), 64.76 (OCH<sub>2</sub>), 97.63, 99.61, 113.42, 125.98, 126.40, 132.67, 135.77, 136.46, 138.25, 142.26; MS m/z (rel. intensity): 56.98 (24), 69.10 (35), 76.04 (28), 84.02 (35), 103.05 (28), 141.00 (19), 217.03 (15), 244.06 (100, M<sup>+</sup>).</p> |
|  <p>EDOT_II</p>  | <p>Yellow oil, isolated yield: 95%; <sup>1</sup>H NMR (400 MHz, CDCl<sub>3</sub>, 296K): δ (ppm) 4.30 (s, 4H, -CH<sub>2</sub>-CH<sub>2</sub>-), 5.17 (d, 2H, J<sub>HH</sub> = 10.9 Hz, -CH=CH<sub>2</sub>), 5.69 (d, 2H, J<sub>HH</sub> = 17.5 Hz, -CH=CH<sub>2</sub>), 6.64 (dd, 2H, J<sub>HH</sub> = 17.5, 10.9 Hz, -CH=CH<sub>2</sub>), 7.34 (d, 2H, J<sub>HH</sub> = 8.4 Hz, -C<sub>6</sub>H<sub>4</sub>-), 7.65 (d, 2H, J<sub>HH</sub> = 8.4 Hz, -C<sub>6</sub>H<sub>4</sub>-); <sup>13</sup>C NMR (100 MHz, CDCl<sub>3</sub>, 296K): δ (ppm) 64.58 (OCH<sub>2</sub>), 113.49, 126.06, 126.45, 132.42, 135.82, 136.46, 138.80; MS m/z (rel. intensity): 56.98 (19), 69.10 (32), 76.10 (29), 84.11 (31), 103.09 (27), 139.90 (19), 243.08 (26), 346.06 (100, M<sup>+</sup>).</p>                                                                                                                             |

## 2.2. Analytical data of EDOT-SQ systems

|                                                                                                                                    |                                                                                                                                                                                                                                                                                                                                                                                                                                                                                                                                                                                                                                                                                                                                                                                                                                                                                                                                                                                       |
|------------------------------------------------------------------------------------------------------------------------------------|---------------------------------------------------------------------------------------------------------------------------------------------------------------------------------------------------------------------------------------------------------------------------------------------------------------------------------------------------------------------------------------------------------------------------------------------------------------------------------------------------------------------------------------------------------------------------------------------------------------------------------------------------------------------------------------------------------------------------------------------------------------------------------------------------------------------------------------------------------------------------------------------------------------------------------------------------------------------------------------|
| 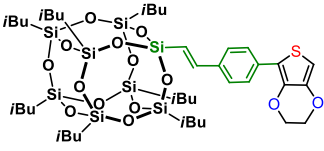 <p style="text-align: center;">EDOT-SQ_I</p>     | <p>Yellow solid, isolated yield: 96%; <sup>1</sup>H NMR (400 MHz, CDCl<sub>3</sub>, 296K): δ (ppm) 0.60-0.68 (m, 14H, CH<sub>2</sub>), 0.93 – 1.02 (m, 42H, CH<sub>3</sub>), 1.83-1.93 (m, 7H, CH), 4.23-4.28 (m, 2H, -CH<sub>2</sub>-CH<sub>2</sub>-), 4.29 – 4.34 (m, 2H, -CH<sub>2</sub>-CH<sub>2</sub>-), 6.12 (d, 1H, J<sub>HH</sub> = 19.2 Hz, =CH), 6.31 (s, 1H, SCH), 7.16 (d, 1H, J<sub>HH</sub> = 19.2 Hz, =CH), 7.43 (d, 2H, J<sub>HH</sub> = 8.4 Hz, -C<sub>6</sub>H<sub>4</sub>-), 7.69 (d, 2H, J<sub>HH</sub> = 8.4 Hz, -C<sub>6</sub>H<sub>4</sub>-); <sup>13</sup>C NMR (100 MHz, CDCl<sub>3</sub>, 296K): δ (ppm) 22.44 (CH<sub>2</sub>), 22.50 (CH<sub>2</sub>), 23.85 (CH), 23.86 (CH), 25.70 (CH<sub>3</sub>), 64.42 (OCH<sub>2</sub>), 64.76 (OCH<sub>2</sub>), 97.63, 117.18, 118.01, 125.90, 127.02, 129.70, 133.50, 135.73, 138.45, 142.25, 147.55; <sup>29</sup>Si NMR (100 MHz, CDCl<sub>3</sub>, 296K): δ (ppm) -67.40, -67.83 (core), -79.90 (SiCH=).</p> |
|  <p style="text-align: center;">EDOT-SQ_II</p>  | <p>Yellow solid, isolated yield: 93%; <sup>1</sup>H NMR (400 MHz, CDCl<sub>3</sub>, 296K): δ (ppm) 0.64-0.70 (m, 28H, CH<sub>2</sub>), 0.98-1.01 (m, 84H, CH<sub>3</sub>), 1.87-1.95 (m, 14H, CH), 4.41 (s, 4H, -CH<sub>2</sub>-CH<sub>2</sub>-), 6.16 (d, 2H, J<sub>HH</sub> = 19.2 Hz, =CH), 7.19 (d, 2H, J<sub>HH</sub> = 19.2 Hz, =CH), 7.47 (d, 4H, J<sub>HH</sub> = 8.4 Hz, -C<sub>6</sub>H<sub>4</sub>-), 7.76 (d, 4H, J<sub>HH</sub> = 8.4 Hz, -C<sub>6</sub>H<sub>4</sub>-); <sup>13</sup>C NMR (100 MHz, CDCl<sub>3</sub>, 296K): δ (ppm) 22.45 (CH<sub>2</sub>), 22.51 (CH<sub>2</sub>), 23.85 (CH), 23.87 (CH), 25.71 (CH<sub>3</sub>), 64.57 (OCH<sub>2</sub>), 115.47, 118.11, 126.00, 126.75, 127.06, 128.51, 133.20, 135.83, 139.01, 147.51; <sup>29</sup>Si NMR (79 MHz, CDCl<sub>3</sub>, 296K): δ (ppm) -67.40, -67.83, -67.85 (core), -79.76 (SiCH=).</p>                                                                                                         |
|  <p style="text-align: center;">EDOT-DDSQ_I</p> | <p>Yellow solid, isolated yield: 94%; <sup>1</sup>H NMR (400 MHz, CDCl<sub>3</sub>, 296K): δ (ppm) 0.45 (s, 6H, SiCH<sub>3</sub>), 4.12-4.49 (m, 8H, -CH<sub>2</sub>-CH<sub>2</sub>-), 6.42 (d, 2H, J<sub>HH</sub> = 19.2 Hz, =CH), 6.92-6.99, 7.04-7.13, 7.15-7.25, 7.27-7.33, 7.34-7.39, 7.44-7.48, 7.54-7.63 (m, 50H, -C<sub>6</sub>H<sub>4</sub>-, -C<sub>6</sub>H<sub>5</sub> and =CH); <sup>13</sup>C NMR (100 MHz, CDCl<sub>3</sub>, 296K): δ (ppm) -0.72 (SiCH<sub>3</sub>), 64.46 (OCH<sub>2</sub>), 64.78 (OCH<sub>2</sub>), 97.81, 123.57, 125.88, 125.97, 126.81, 127.02, 127.08, 127.51, 127.55, 127.59, 127.79, 128.38, 130.21, 130.26, 130.35, 132.02, 134.00, 134.12, 146.17; <sup>29</sup>Si NMR (79 MHz, CDCl<sub>3</sub>, 296K): δ (ppm) -30.03 (SiCH=), -76.98, -78.14 (core).</p>                                                                                                                                                                                |

### 3. NMR spectra of EDOT derivatives

#### 3.1. NMR spectra of EDOTs

EDOT\_I

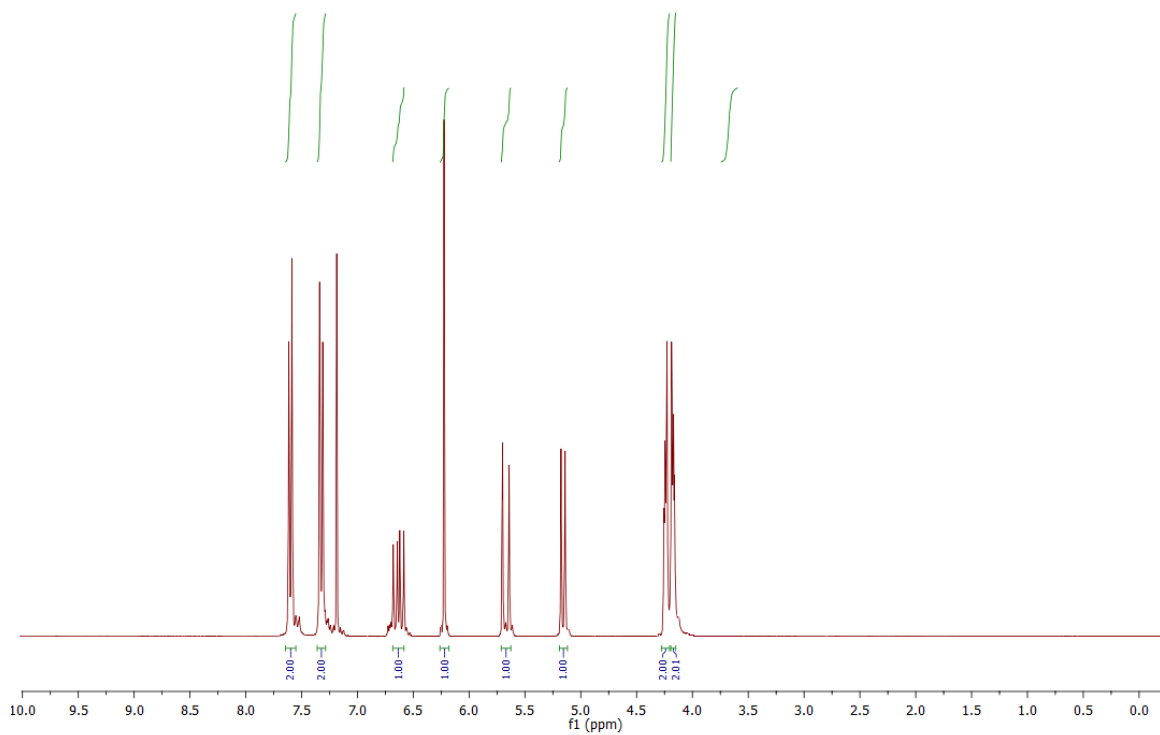

Figure S5. <sup>1</sup>H NMR (400 MHz, CDCl<sub>3</sub>) of EDOT\_I

EDOT\_I

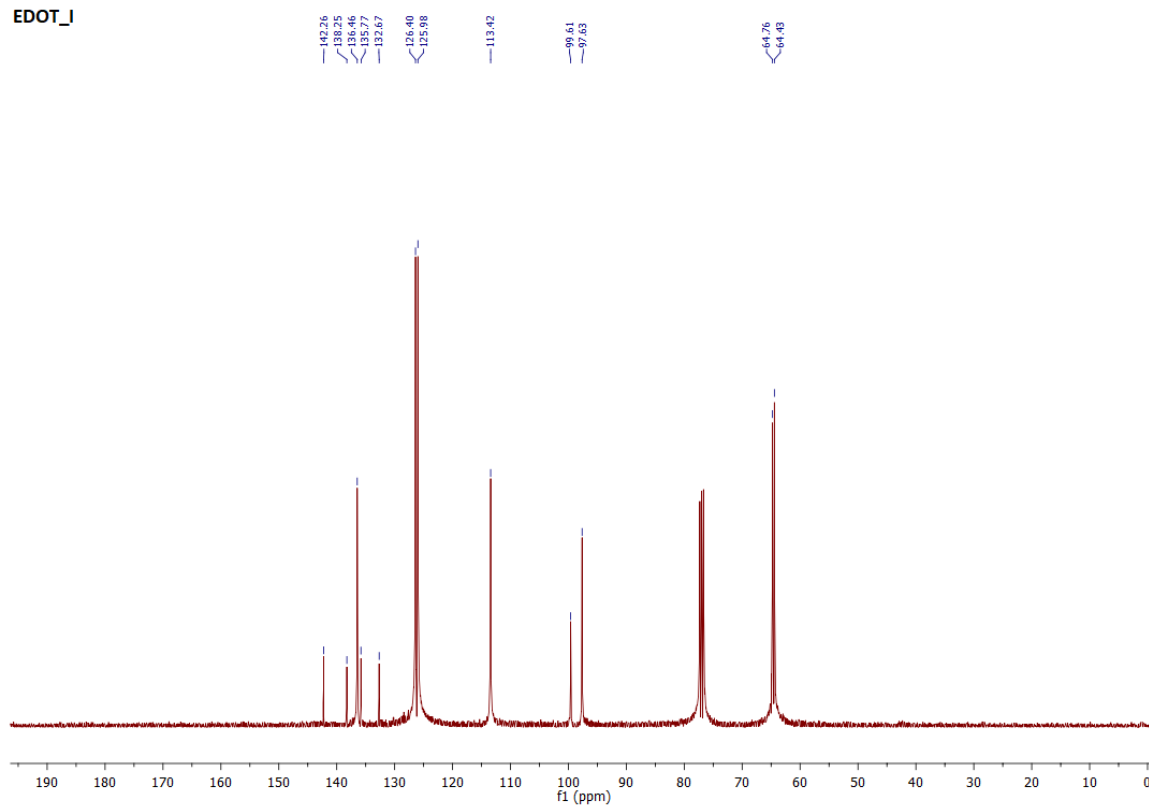

Figure S6. <sup>13</sup>C NMR (101 MHz, CDCl<sub>3</sub>) of olefin EDOT\_I

EDOT\_II

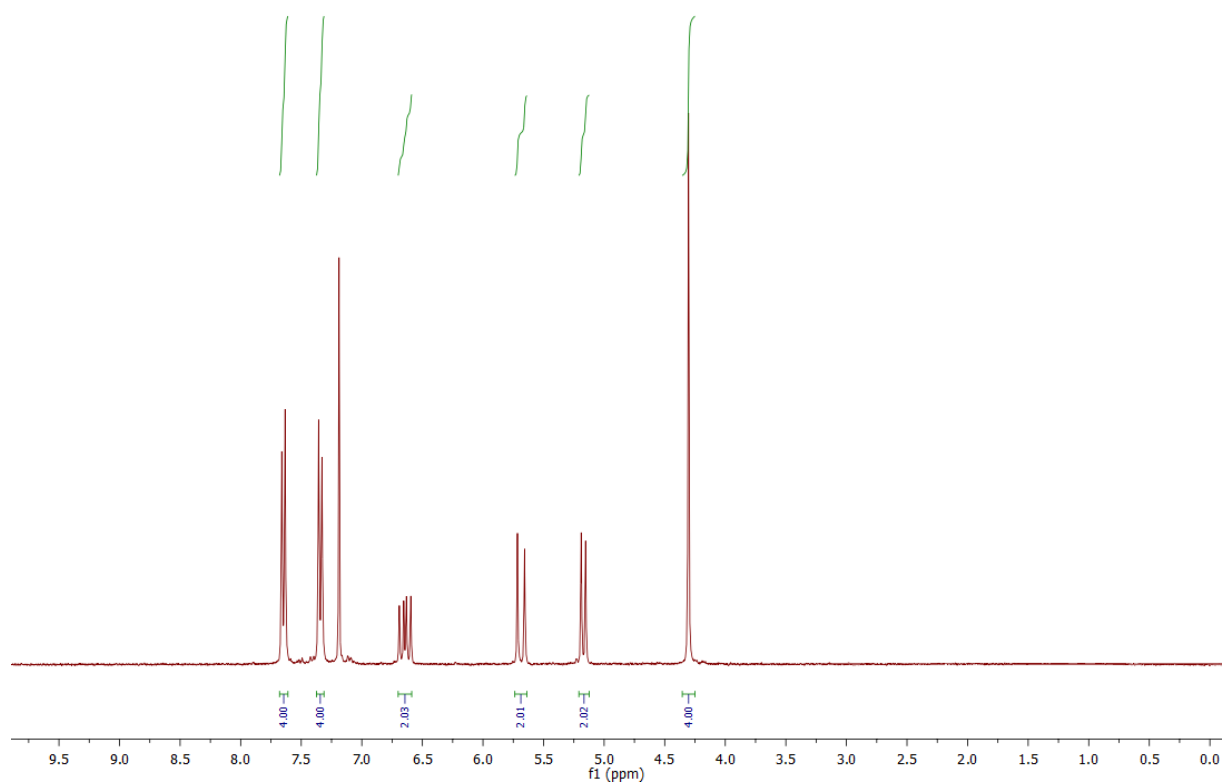

Figure S7.  $^1\text{H}$  NMR (400 MHz,  $\text{CDCl}_3$ ) of **EDOT\_II**

EDOT\_II

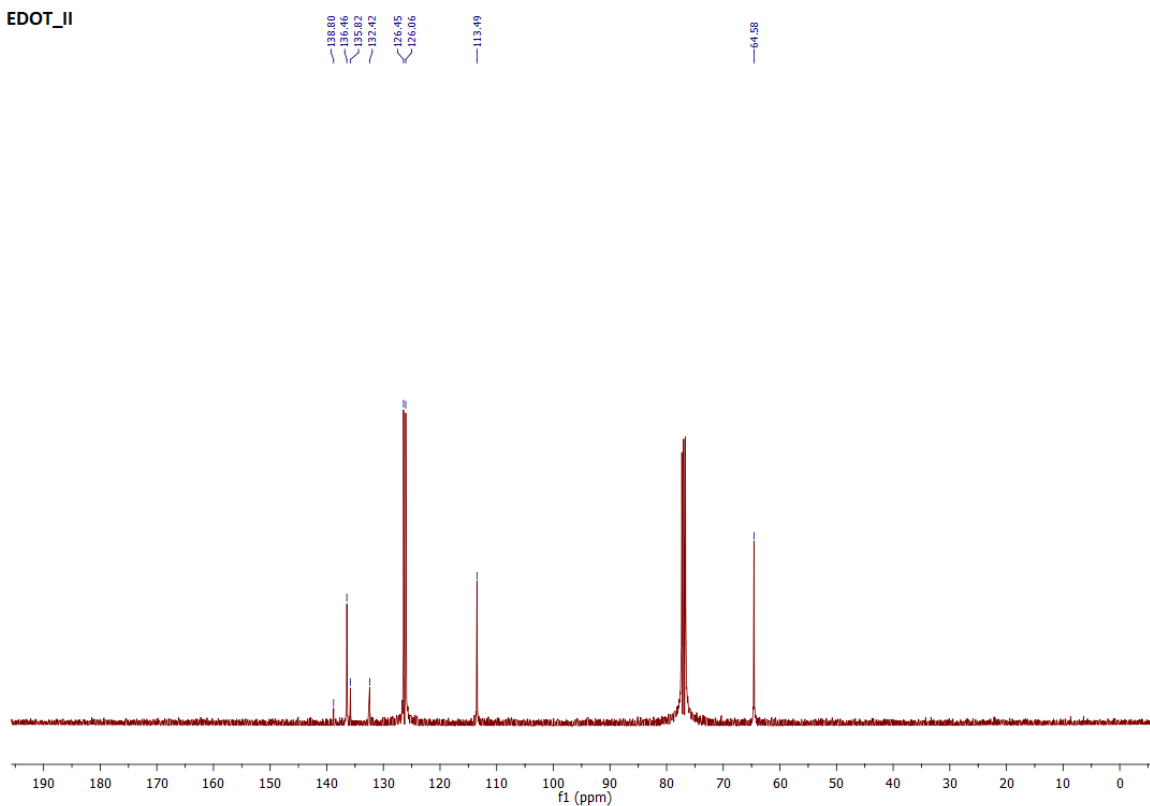

Figure S8.  $^{13}\text{C}$  NMR (101 MHz,  $\text{CDCl}_3$ ) of olefin **EDOT\_II**

### 3.2. NMR spectra of EDOT-SQ systems

EDOT-SQ\_I

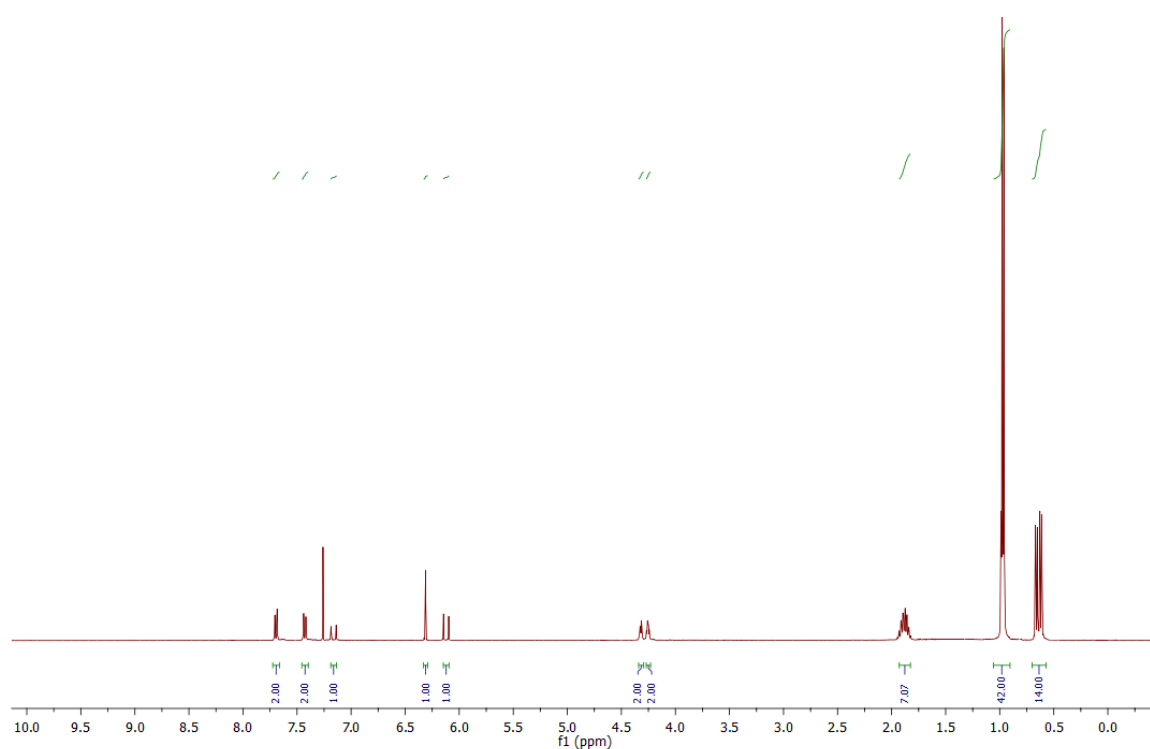

Figure S9. <sup>1</sup>H NMR (400 MHz, CDCl<sub>3</sub>) of EDOT-SQ\_I

EDOT-SQ\_I

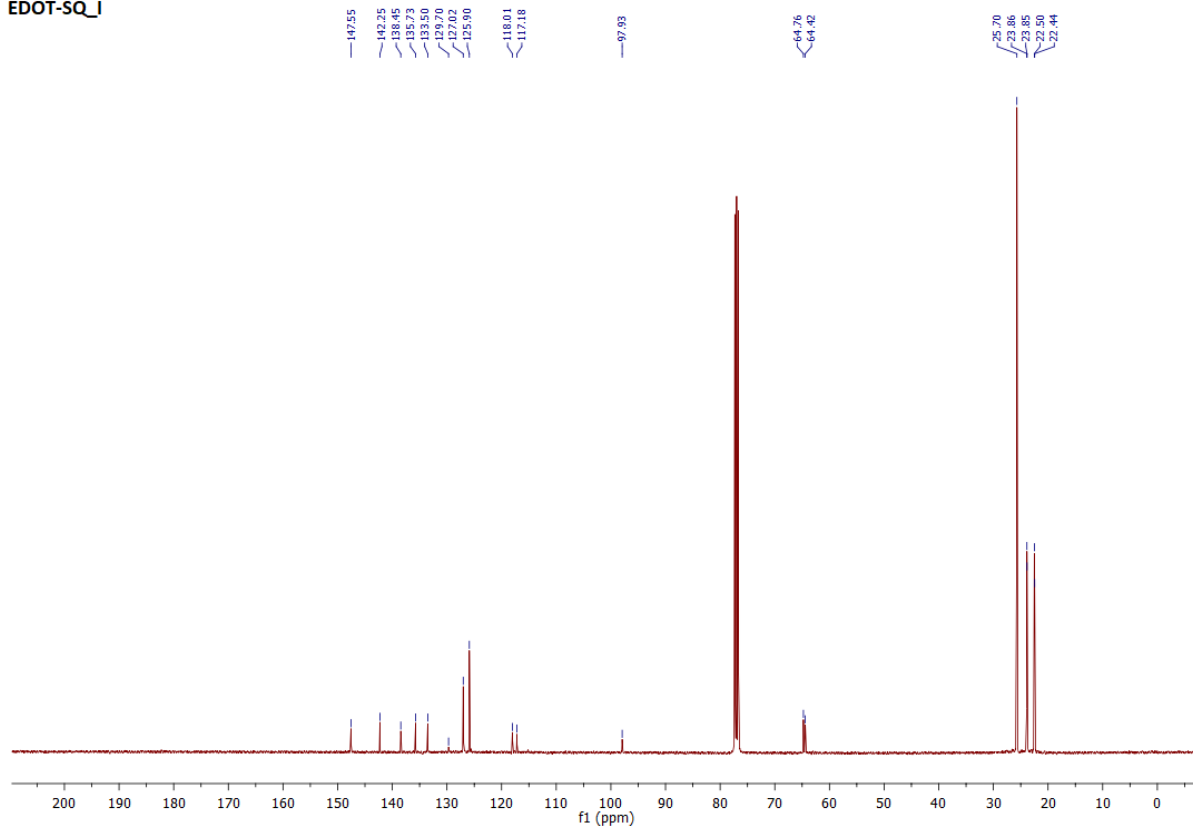

Figure S10. <sup>13</sup>C NMR (101 MHz, CDCl<sub>3</sub>) of EDOT-SQ\_I



EDOT-SQ\_I

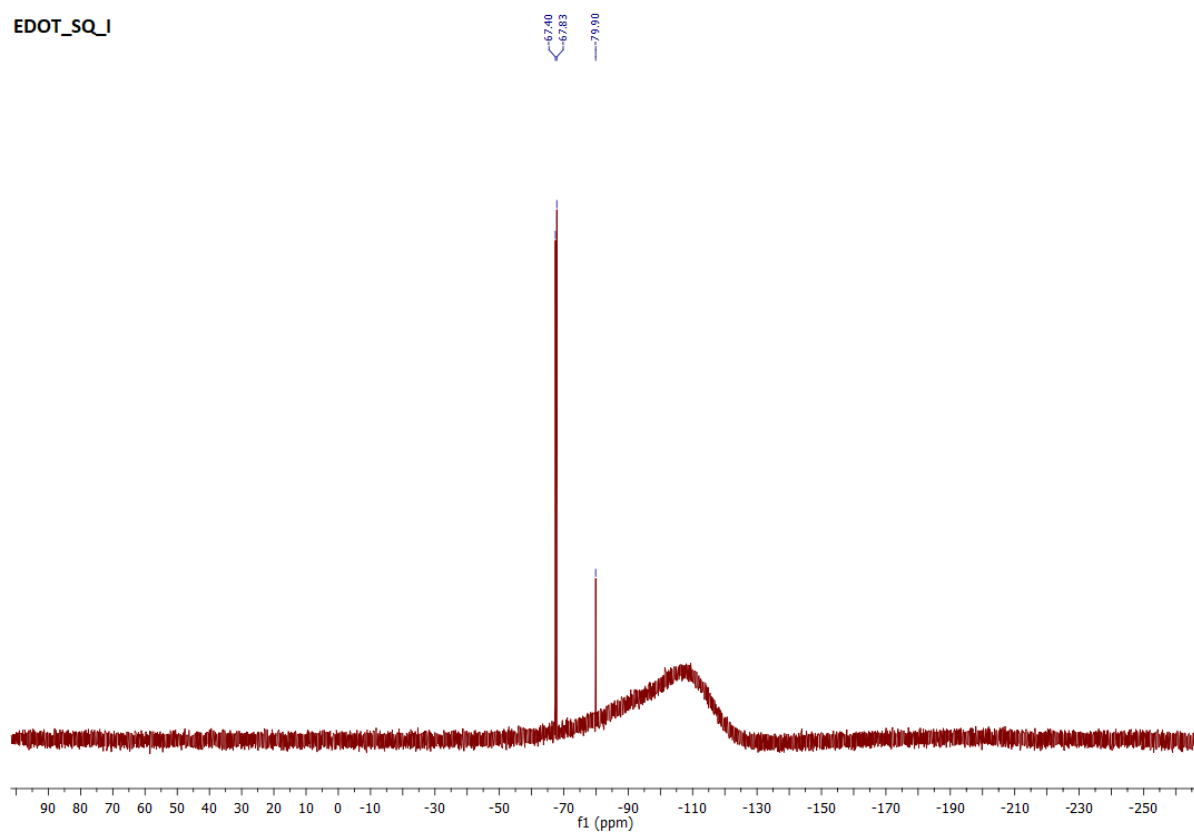

Figure S11.  $^{29}\text{Si}$  NMR (79 MHz,  $\text{CDCl}_3$ ) of EDOT-SQ\_I

EDOT-SQ\_II

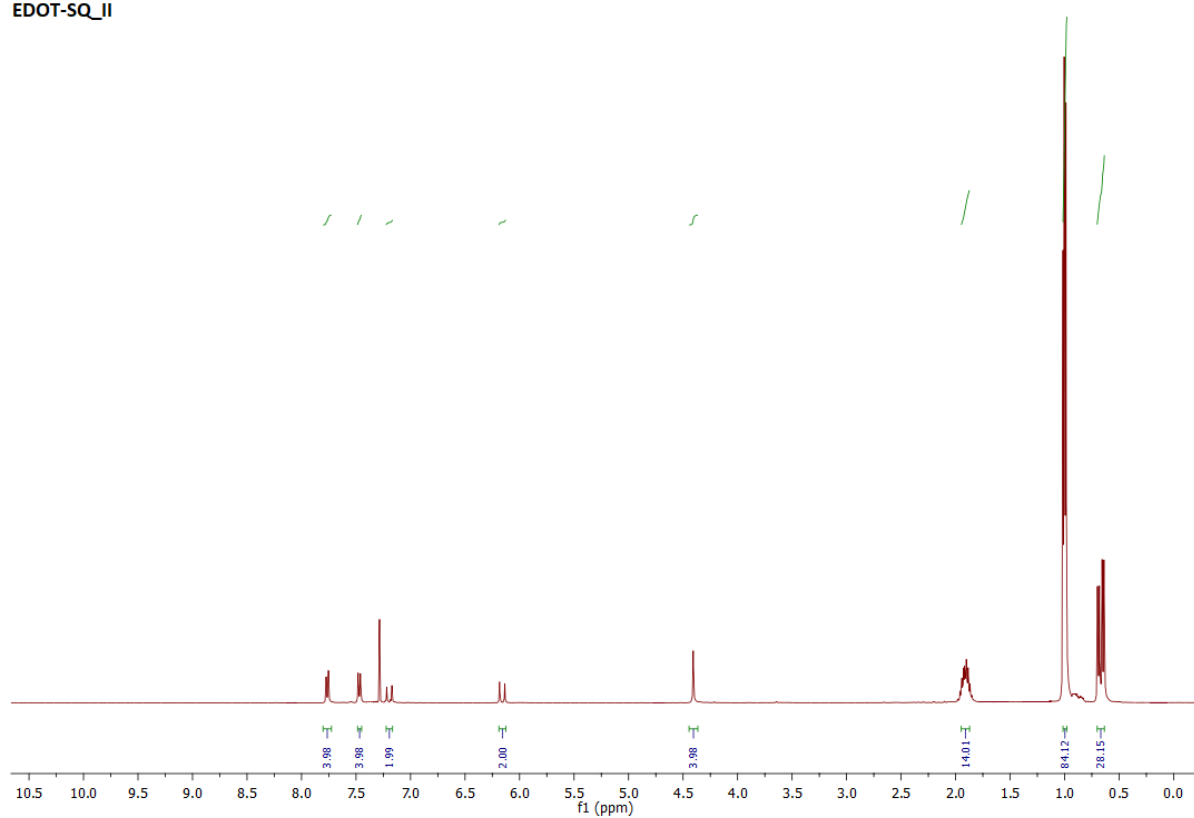

Figure S12.  $^1\text{H}$  NMR (400 MHz,  $\text{CDCl}_3$ ) of product EDOT-SQ\_II

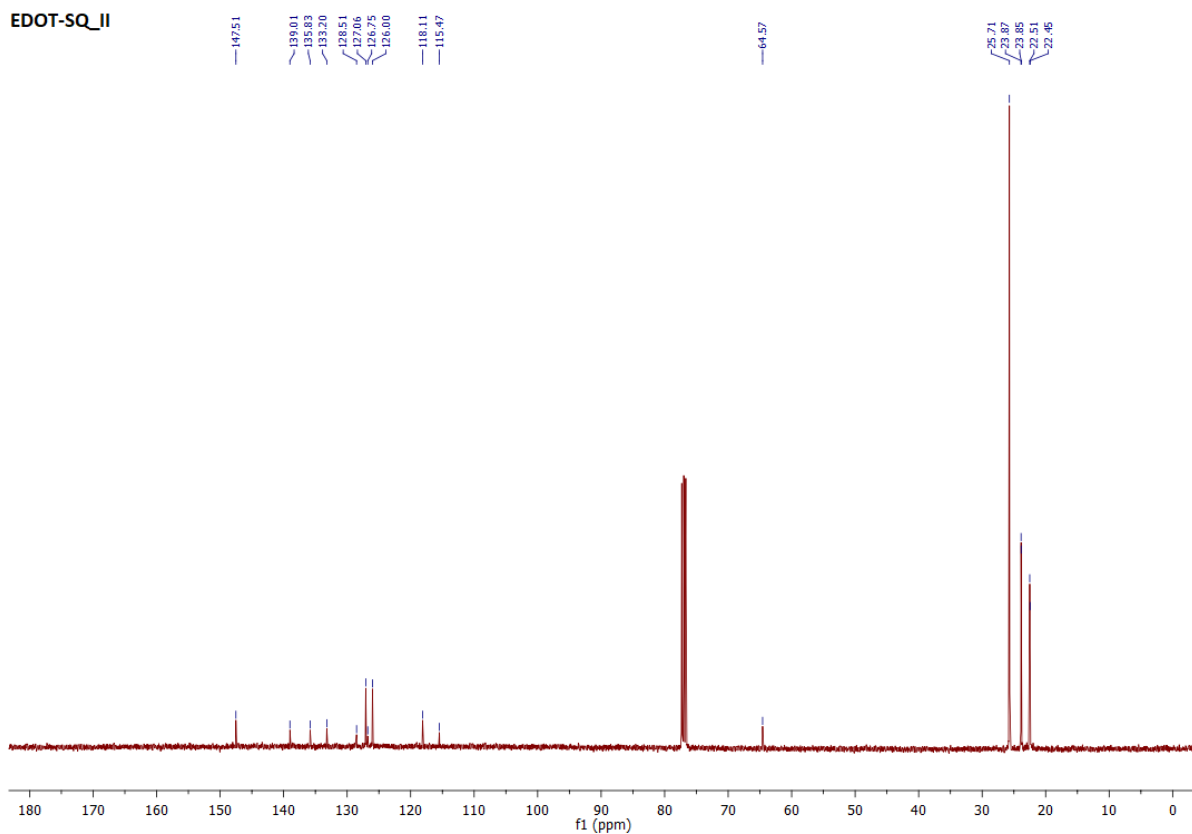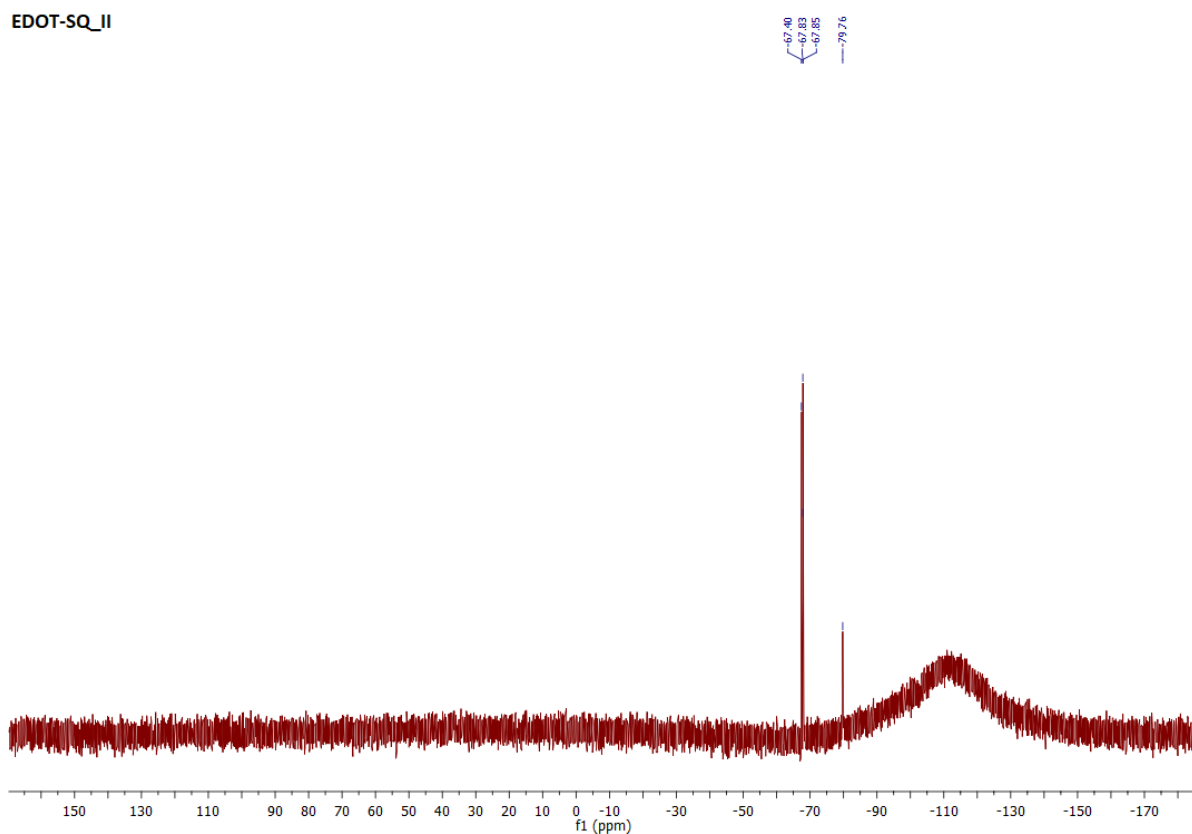

EDOT-DDSQ\_I

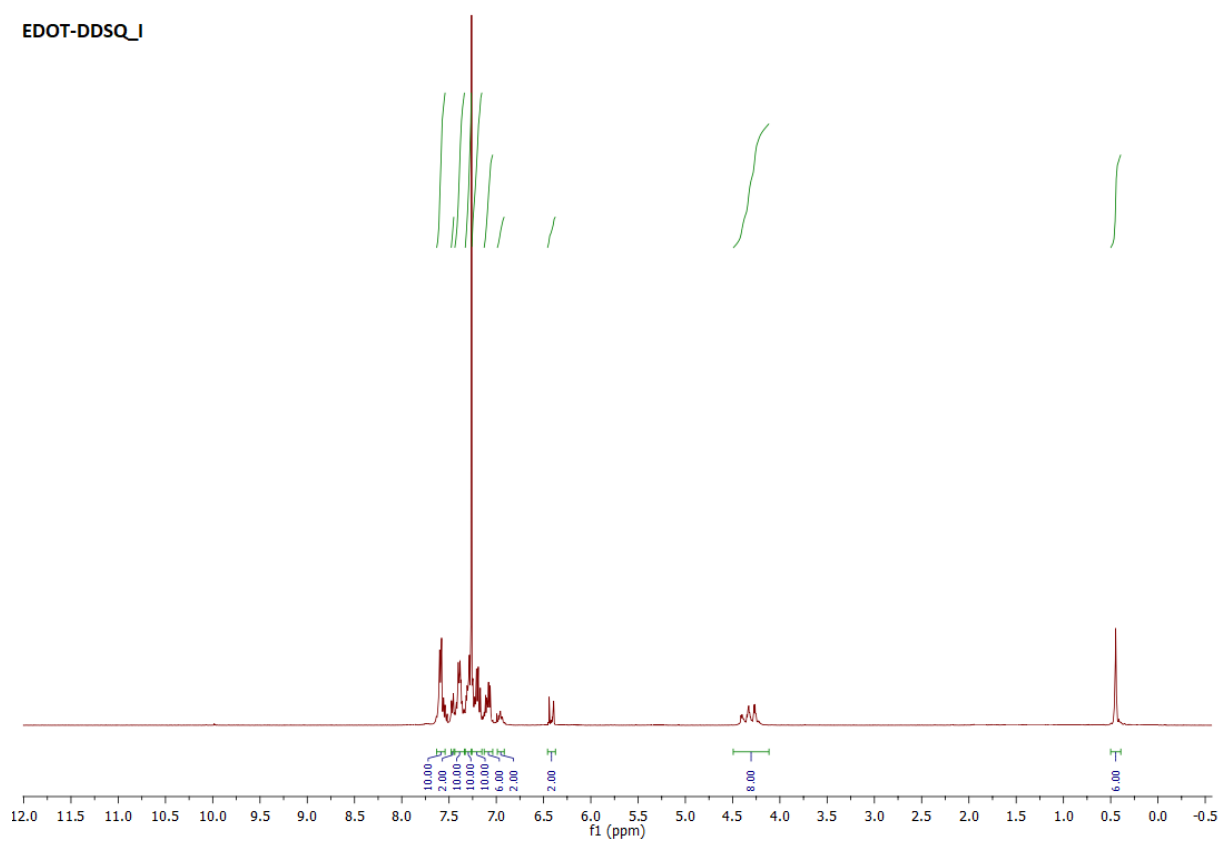

Figure S15. <sup>1</sup>H NMR (400 MHz, CDCl<sub>3</sub>) of product EDOT-DDSQ\_I

EDOT-DDSQ\_I

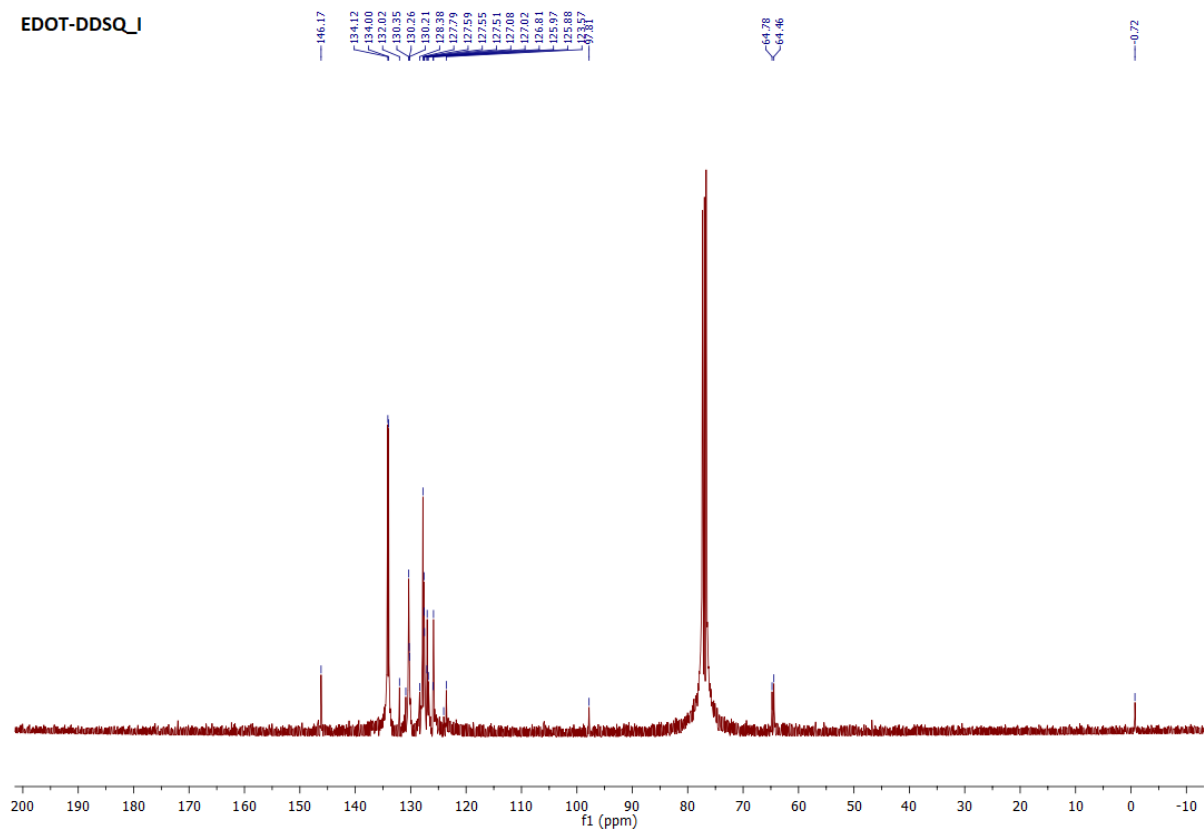

Figure S16. <sup>13</sup>C NMR (101 MHz, CDCl<sub>3</sub>) of product EDOT-DDSQ\_I

EDOT-DDSQ\_I

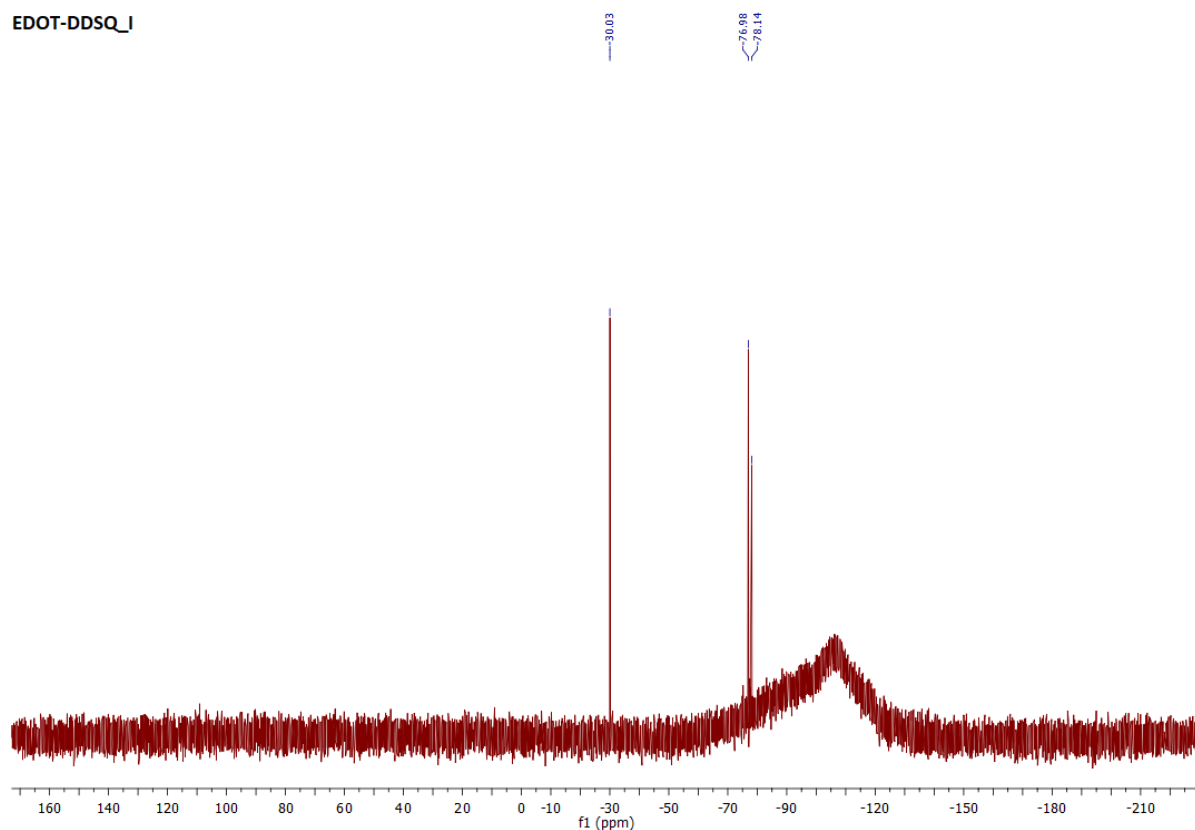

Figure S17.  $^{29}\text{Si}$  NMR (79 MHz,  $\text{CDCl}_3$ ) of product EDOT-DDSQ\_I

#### 4. References

- [1] X. Yin, Z. Li, J. Jin, C. Tusy, J. Xia, *Facile synthesis of poly(3,4-ethylenedioxythiophene) by acid-assisted polycondensation of 5-bromo-2,3-dihydro-thieno[3,4-b][1,4]dioxine*, *Synth. Met.*, 2013, **175**, 97.
- [2] J. J. Apperloo, L. Bert Groenendaal, H. Verheyen, M. Jayakannan, R. A. J. Janssen, A. Dkhissi, D. Beljonne, R. Lazzaroni, J.-L. Brédas, *Optical and Redox Properties of a Series of 3,4-Ethylenedioxythiophene Oligomers*, *Chem. Eur. J.*, 2002, **8**, 2384.
